# Supplementary material
Source: Springer Nature journal article supplement (https://www.springermedizin.de/resource/supplementary/13012_2008_157_MOESM2_ESM.pdf/9629360)

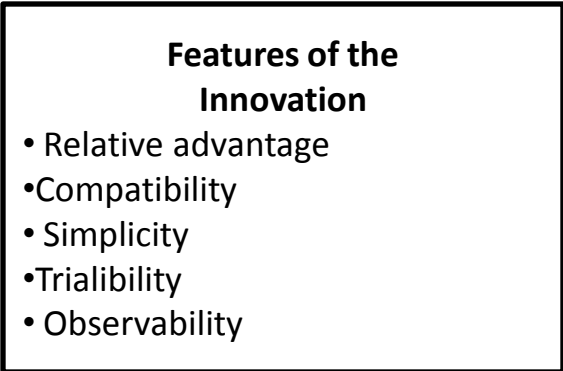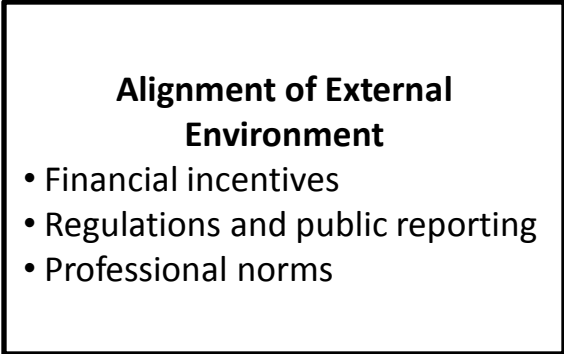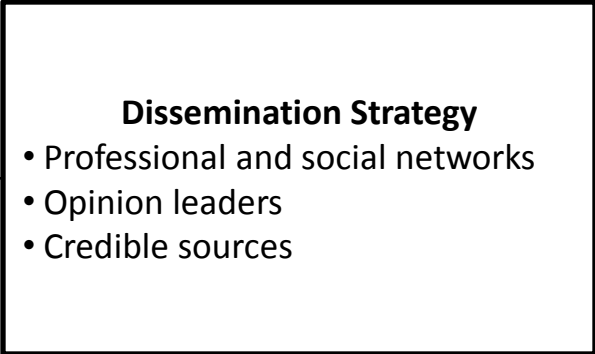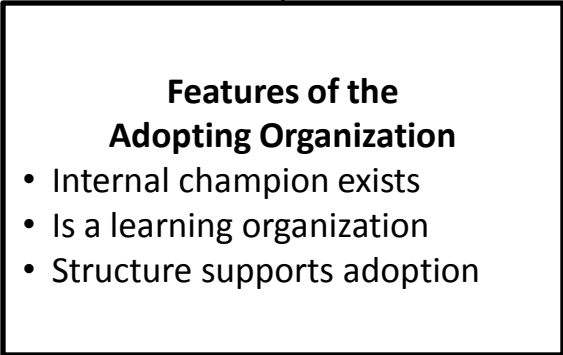

Diffusion

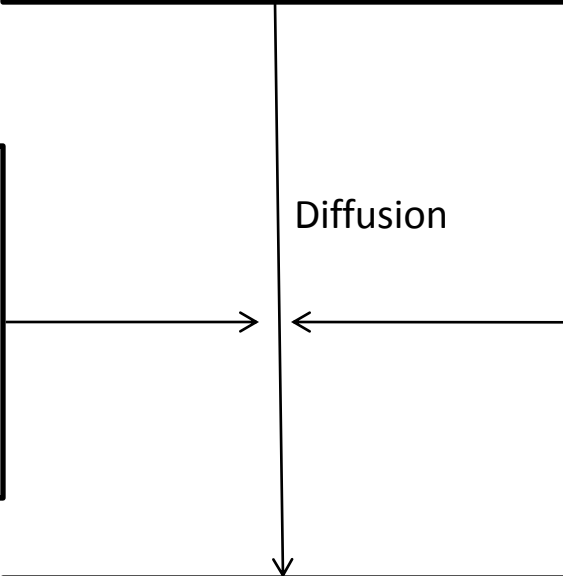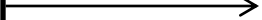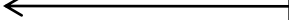

Supplement: MOESM2 [file 9629360]
